# Supplementary figures and images for: Distinct transcriptional MYCN/c-MYC activities are associated with spontaneous regression or malignant progression in neuroblastomas
Source: Springer Nature journal article supplement (doi:10.1186/gb-2008-9-10-r150), 2008-10-13

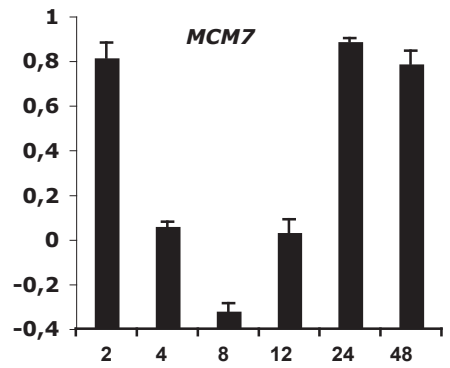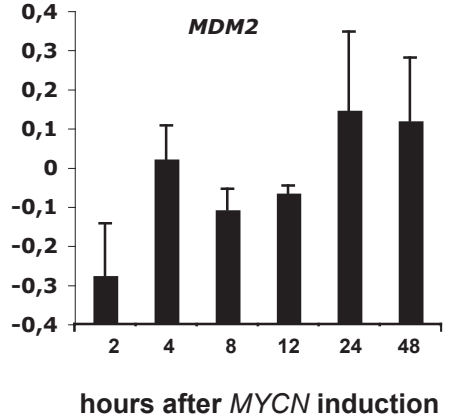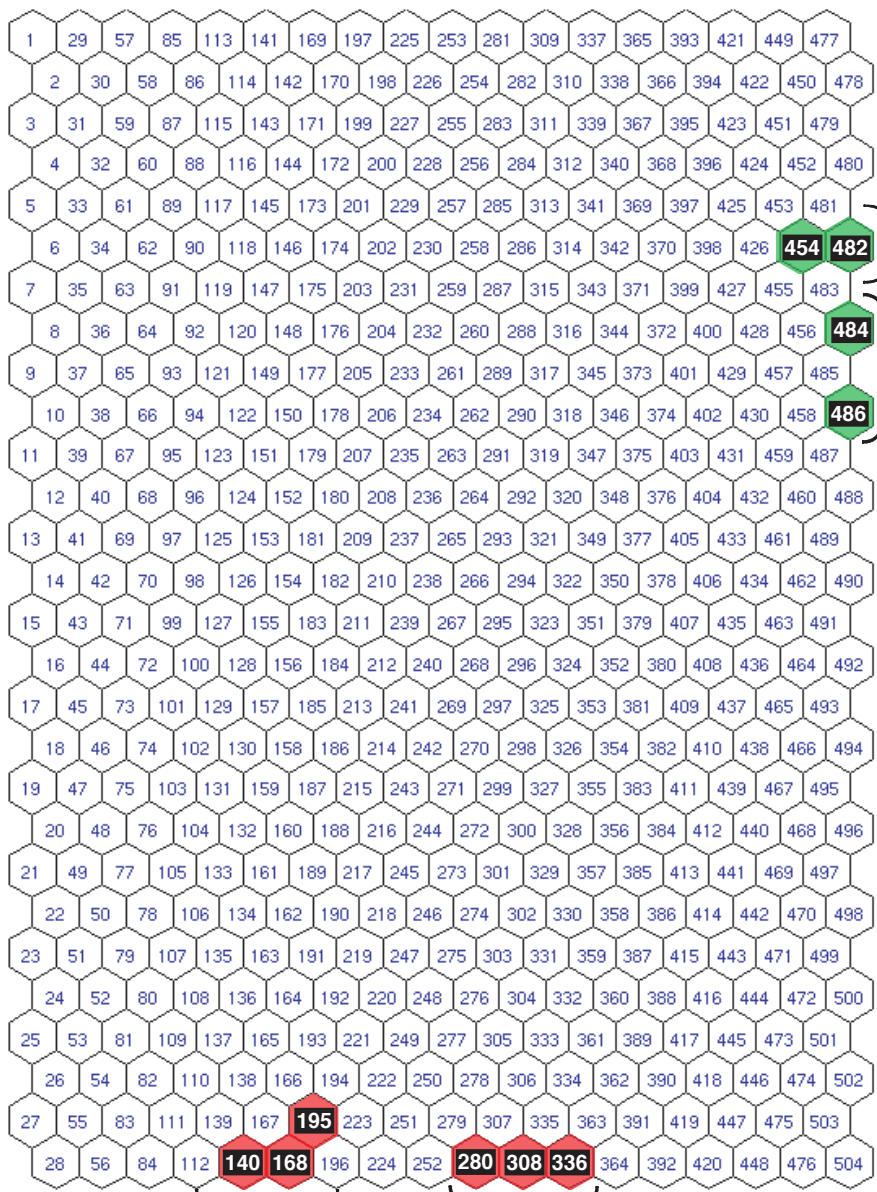

■ clusters with MYCN repressed genes  
■ clusters with MYCN/c-MYC induced genes

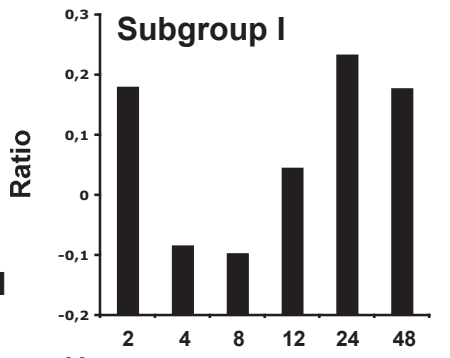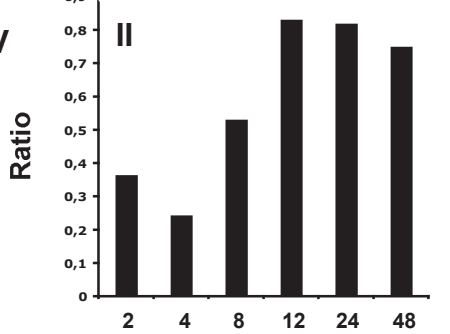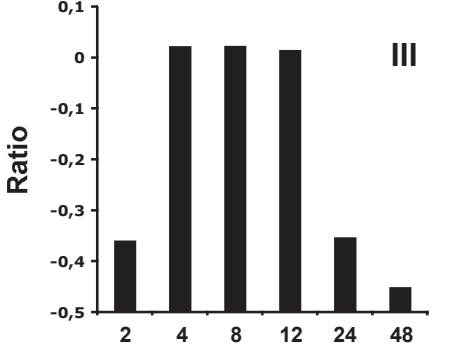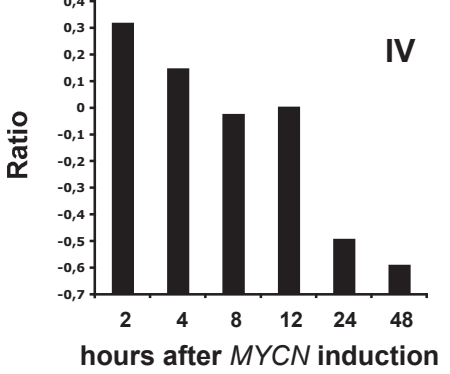

Supplement: Additional file 1 [file gb-2008-9-10-r150-s1.pdf]
